# Supplementary material for: Response-adaptive randomization in clinical trials: from myths to practical considerations
Source: PubMed Central journal article supplement (PMC7614644; doi:10.1214/22-sts865), 2023-05
Supplement: EMS153897-supplement-Supplementary_Appendix.pdf [file EMS153897-supplement-Supplementary_Appendix.pdf]

**APPENDIX**

TABLE A1  
*Table of acronyms used in the paper.*

| <b>Acronym</b> | <b>Definition</b>                                 |
|----------------|---------------------------------------------------|
| BRAR           | Bayesian Response-Adaptive Randomization          |
| CARA           | Covariate-Adjusted Response-Adaptive              |
| DBCD           | Doubly-adaptive Biased Coin Design                |
| DTL            | Drop-The-Loser                                    |
| ENF            | Expected Number of Failures                       |
| ENS            | Expected Number of Successes                      |
| ER             | Equal Randomization                               |
| ERADE          | Efficient Response-Adaptive Randomization Designs |
| FLGI           | Forward-Looking Gittins Index                     |
| MAMS           | Multi-Arm Multi-Stage                             |
| MLE            | Maximum Likelihood Estimator                      |
| PBR            | Permuted Block Randomization                      |
| RAR            | Response-Adaptive Randomization                   |
| RCT            | Randomized Controlled Trial                       |
| RPW            | Randomized Play-the-Winner                        |
| TS             | Thompson Sampling                                 |
| TW             | Thall and Wathen                                  |

TABLE A2

*Properties of various patient allocation procedures, where  $p_0 = 0.25$  and  $p_1 = 0.45$ . Results are from  $10^4$  trial replicates.*

| $n$ | Procedure        | Patient Benefit Metrics |                 |          |
|-----|------------------|-------------------------|-----------------|----------|
|     |                  | $N_1 - N_0$             | $\hat{S}_{0.1}$ | ENS      |
| 200 | ER               | 0 (-28, 28)             | 0.069           | 70 (6.8) |
|     | PBR              | 0                       | 0               | 70 (6.6) |
|     | Oracle           | 200                     | 0               | 90 (7.0) |
|     | TS               | 147 (-54, 194)          | 0.032           | 85 (9.5) |
|     | FLGI( $b = 5$ )  | 165 (48, 194)           | 0.014           | 86 (8.6) |
|     | FLGI( $b = 10$ ) | 164 (56, 192)           | 0.014           | 86 (8.6) |
|     | TW(1/2)          | 124 (24, 182)           | 0.008           | 82 (8.2) |
|     | TW( $i/2n$ )     | 88 (20, 148)            | 0.001           | 79 (7.6) |
|     | RPW              | 30 (-2, 64)             | 0.000           | 73 (7.1) |
|     | DBCD             | 30 (6, 58)              | 0.000           | 73 (6.6) |
|     | ERADE            | 29 (8, 52)              | 0.000           | 73 (6.6) |
|     | DTL              | 30 (10, 50)             | 0.000           | 73 (7.1) |
